# Supplementary material for: Estrogen Regulates Glucose Metabolism in Cattle Neutrophils Through Autophagy
Source: Front Vet Sci. 2021 Nov 29;8:773514. doi: 10.3389/fvets.2021.773514 (PMC8666889; doi:10.3389/fvets.2021.773514)
Supplement: Supplementary file 1 [file Data_Sheet_1.ZIP]

Archive with 41 entries (37 files):
- original source data/Data analysis.xlsx
- original source data/flow cytometry data Figure 6E.fcs/
- original source data/flow cytometry data Figure 6E.fcs/FITC.fcs
- original source data/flow cytometry data Figure 6E.fcs/HG (repeat 1).fcs
- original source data/flow cytometry data Figure 6E.fcs/HG (repeat 2).fcs
- original source data/flow cytometry data Figure 6E.fcs/HG (repeat 3).fcs
- original source data/flow cytometry data Figure 6E.fcs/HG+E2 (repeat 1).fcs
- original source data/flow cytometry data Figure 6E.fcs/HG+E2 (repeat 2).fcs
- original source data/flow cytometry data Figure 6E.fcs/HG+E2 (repeat 3).fcs
- original source data/flow cytometry data Figure 6E.fcs/LG (repeat 1).fcs
- original source data/flow cytometry data Figure 6E.fcs/LG (repeat 2).fcs
- original source data/flow cytometry data Figure 6E.fcs/LG (repeat 3).fcs
- original source data/flow cytometry data Figure 6E.fcs/LG+E2 (repeat 1).fcs
- original source data/flow cytometry data Figure 6E.fcs/LG+E2 (repeat 2).fcs
- original source data/flow cytometry data Figure 6E.fcs/LG+E2 (repeat 3).fcs
- original source data/flow cytometry data Figure 6E.fcs/NG (repeat 1).fcs
- original source data/flow cytometry data Figure 6E.fcs/NG (repeat 2).fcs
- original source data/flow cytometry data Figure 6E.fcs/NG (repeat 3).fcs
- original source data/flow cytometry data Figure 6E.fcs/NG+E2 (repeat 1).fcs
- original source data/flow cytometry data Figure 6E.fcs/NG+E2 (repeat 2).fcs
- original source data/flow cytometry data Figure 6E.fcs/NG+E2 (repeat 3).fcs
- original source data/flow cytometry data Figure 6E.fcs/PE.fcs
- original source data/Western blot image Figure 4E/
- original source data/Western blot image Figure 4E/1. First line GLUT1.tif
- original source data/Western blot image Figure 4E/2. Second line GLUT4.tif
- original source data/Western blot image Figure 4E/3. Third line SGLT1.tif
- original source data/Western blot image Figure 4E/4. Fourth line a┬-actin.tif
- original source data/Western blot image Figure 5A/
- original source data/Western blot image Figure 5A/1 line p-AMPK.tif
- original source data/Western blot image Figure 5A/2 line AMPK.tif
- original source data/Western blot image Figure 5A/3 line a┬-actin.tif
- original source data/Western blot image Figure 5A/4th line LC3.tif
- original source data/Western blot image Figure 5A/5th line ATG5.tif
- original source data/Western blot image Figure 5A/6th line Beclin1.tif
- original source data/Western blot image Figure 5A/7th line p62.tif
- original source data/Western blot image Figure 5A/8th line a┬-actin.tif
- original source data/Western blot image Figure 6A/
- original source data/Western blot image Figure 6A/1. First line Bax.tif
- original source data/Western blot image Figure 6A/2. Second line a┬-actin.tif
- original source data/Western blot image Figure 6A/3. Third line Bcl-2.tif
- original source data/Western blot image Figure 6A/4. Fourth line a┬-actin.tif
