# Supplementary material for: Estrogen Regulates Glucose Metabolism in Cattle Neutrophils Through Autophagy
Source: Front Vet Sci. 2021 Nov 29;8:773514. doi: 10.3389/fvets.2021.773514 (PMC8666889; doi:10.3389/fvets.2021.773514)
Supplement: Supplementary file 1 [file Data_Sheet_1.ZIP › original source data/Data analysis.xlsx]

## Sheet: Sheet1
1.CCK-8 analyses
		5.5mM GLU				2.5mM GLU				25mM GLU
	0h	100	100	100	100	100	100	100	100	100	100	100	100
	2h	83.4904	87.582	94.8302	84.2959	83.9817	83.9739	84.8454	84.7699	84.8448	89.9358	87.542	86.9956
	4h	85.6755	83.4436	90.8169	75.0907	76.8903	77.6157	78.8226	82.0055	80.4069	82.6524	87.7815	88.0109
	6h	80.7328	81.5132	80.3444	78.8117	73.0305	75.7739	73.8753	74.2788	82.9454	80.4224	82.1789	83.4068
	8h	65.6142	66.2253	61.2807	65.8606	60.2728	62.0107	61.4623	60.0064	62.598	64.8328	62.989	63.3207
	12h	47.9303	40.9509	60.1888	49.7009	41.8864	45.3998	44.1624	46.5868	50.8148	48.6857	47.2647	46.5334
		5.5 mM GLU+20 pg/mL				5.5 mM GLU+200 pg/mL				5.5 mM GLU+450 pg/mL
	0h	100	100	100	100	100	100	100	100	100	100	100	100
	2h	94.9598	96.4025	81.4013	88.3063	93.1065	88.1837	92.79	95.3174	95.9818	88.1624	94.0293	96.3286
	4h	88.2636	81.8462	89.5006	90.547	95.8333	92.2977	85.1478	95.0939	92.6226	90.6006	90.3475	94.0333
	6h	91.2886	89.5872	81.9044	80.8769	88.1116	89.1602	89.3466	93.5143	90.3913	94.1249	88.5331	87.0309
	8h	81.1479	88.2181	72.3624	79.1194	71.8338	82.8229	87.7193	86.7187	82.7136	88.7164	87.0024	86.821
	12h	69.7867	71.5626	70.9091	70.2134	79.6328	73.6335	66.7496	74.5262	79.728	80.6326	73.6342	76.0023
		2.5 mM GLU+20 pg/mL				2.5 mM GLU+200 pg/mL				2.5 mM GLU+450 pg/mL
	0h	100	100	100	100	100	100	100	100	100	100	100	100
	2h	94.9598	96.4025	81.4013	88.3063	93.1065	88.1837	92.79	95.3174	97.9818	94.1624	93.0293	96.3286
	4h	88.2636	81.8462	89.5006	90.547	95.8333	92.2977	85.1478	95.0939	95.6226	93.6006	90.3475	92.0333
	6h	91.2886	89.5872	81.9044	80.8769	88.1116	89.1602	89.3466	93.5143	88.3913	90.1249	91.5331	93.0309
	8h	81.1479	88.2181	72.3624	79.1194	71.8338	82.8229	87.7193	86.7187	82.7136	80.7164	90.0024	87.821
	12h	69.7867	71.5626	70.9091	70.2134	79.6328	73.6335	66.7496	74.5262	79.728	69.6326	75.6342	76.0023
		25 mM GLU+20 pg/mL				25 mM GLU+200 pg/mL				25 mM GLU+450 pg/mL
	0h	100	100	100	100	100	100	100	100	100	100	100	100
	2h	91.429	83.1262	96.8379	92.791	96.4951	91.9091	88.4042	91.9834	96.6005	92.8533	90.6714	94.9406
	4h	92.2412	84.1549	90.3007	90.6364	92.3689	95.683	87.8441	95.2137	94.0756	94.2134	89.9605	96.0263
	6h	84.3289	85.6661	85.4979	85.0057	88.2785	91.1043	91.7898	91.3278	92.3105	91.6566	90.4974	92.8966
	8h	68.9471	73.3601	80.1053	73.3554	86.8369	83.8514	81.8562	72.1035	88.7248	84.7173	82.9901	76.1844
	12h	63.9578	63.9307	60.0126	65.2044	76.4666	68.4582	72.7422	72.7292	76.9046	70.715	72.4516	73.4468
2.Biochemical analyses and ELISA
Glycogen	LG	LG+EL	LG+EM	LG+EH		NG	NG+EL	NG+EM	NG+EH		HG	HG+EL	HG+EM	HG+EH
	0.00427644	0.0113982	0.0199188	0.0405425		0.00620063	0.00707386	0.00791785	0.0137326		0.00951609	0.0236235	0.0192458	0.0369572
	0.00390012	0.0167494	0.0140788	0.0402436		0.00742312	0.0109578	0.0122005	0.0112318		0.00902427	0.0190752	0.0225385	0.0193229
	0.00431661	0.0170333	0.0254365	0.0237419		0.00647478	0.0109555	0.0111869	0.00975798		0.00792322	0.00743087	0.0206591	0.0286044
GSK-3β	LG	LG+EL	LG+EM	LG+EH		NG	NG+EL	NG+EM	NG+EH		HG	HG+EL	HG+EM	HG+EH
	226.637	185.228	178.819	184.686		177.299	147.797	152.41	143.432		131.131	124.811	110.446	107.717
	209.89	189.614	172.161	140.481		181.188	165.841	158.321	155.41		152.437	132.713	119.526	101.37
	199.481	167.548	147.299	144.161		186.277	169.343	155.095	143.526		143.735	121.663	118.228	100.957
ATP	LG	LG+EL	LG+EM	LG+EH		NG	NG+EL	NG+EM	NG+EH		HG	HG+EL	HG+EM	HG+EH
	0.100968	0.154831	0.137436	0.15342		0.128001	0.170058	0.150402	0.159725		0.149255	0.155295	0.15496	0.133392
	0.0937533	0.129411	0.122295	0.159019		0.124379	0.192653	0.139503	0.15741		0.147979	0.166953	0.16496	0.123552
	0.123511	0.147898	0.117636	0.136622		0.105058	0.129085	0.115526	0.163197		0.135222	0.177306	0.152176	0.153073
	0.127345	0.110561	0.169152	0.188824		0.15754	0.109302	0.18511	0.196585		0.183698	0.141132	0.14072	0.134175
	0.11385	0.159275	0.150517	0.195716		0.153082	0.137111	0.171696	0.193736		0.182128	0.148558	0.16072	0.142064
	0.072014	0.0920288	0.144783	0.16815		0.129302	0.13272	0.142186	0.200858		0.166428	0.158222	0.14114	0.128398
PFK1	LG	LG+EL	LG+EM	LG+EH		NG	NG+EL	NG+EM	NG+EH		HG	HG+EL	HG+EM	HG+EH
	596.512	610.155	579.733	401.697		818.663	802.793	867.563	576.096		985.118	1171.28	981.736	1181.34
	612.331	590.192	541.944	556.761		859.802	898.371	783.362	640.867		1056.13	868.268	1191.79	1297.21
	645.879	609.458	577.366	411.825		940.813	792.683	627.912	679.729		968.029	1191.48	1077.01	1366.56
G6PDH	LG	LG+EL	LG+EM	LG+EH		NG	NG+EL	NG+EM	NG+EH		HG	HG+EL	HG+EM	HG+EH
	0.0125144	0.00720553	0.00823767	0.00460363		0.00733432	0.00486269	0.00413263	0.00251547		0.00473805	0.0127738	0.0142347	0.0157385
	0.00913215	0.00735471	0.00550898	0.00803886		0.00817905	0.00433256	0.00376565	0.00448829		0.00413924	0.0137042	0.0135503	0.0150098
	0.0125143	0.00828753	0.00811747	0.00611747		0.00811019	0.00430146	0.00333722	0.00295336		0.00522338	0.014118	0.015143	0.0152503
HK	LG	LG+EL	LG+EM	LG+EH		NG	NG+EL	NG+EM	NG+EH		HG	HG+EL	HG+EM	HG+EH
	0.0113082	0.012673	0.013959	0.0143525		0.0103461	0.0108232	0.0106412	0.011804		0.0126408	0.0100701	0.010886	0.00657377
	0.0105787	0.0128866	0.010685	0.0130453		0.0120014	0.0120257	0.0102865	0.0100422		0.0130359	0.00897549	0.00855332	0.0081678
	0.011065	0.0127116	0.0135358	0.0141999		0.0125532	0.0119055	0.0141142	0.0115348		0.0117191	0.00956743	0.0089421	0.00940541
3.Western blotting analysis
LC3		NG	NG+EH	LG	LG+EH	HG	HG+EH
	LC3II	41018	61963	79639	95079	48101	70708
		37043	59176	76078	86847	45747	66080
		39728	60763	78995	93114	46980	69405
	LC3I	43830	40171	42915	45025	15822	33461
		41106	37603	41731	41832	14752	31842
		42492	39759	42621	44459	15345	32632
	LC3II/LC3I	0.935843	1.54248	1.85574	2.11169	3.04013	2.11315
		0.901158	1.5737	1.82306	2.07609	3.10107	2.07525
		0.934952	1.52828	1.85343	2.09438	3.06158	2.1269
AMPK	P-AMPK	23896	36552	52879	58364	64859	52048
		24190	36691	54935	59522	66748	52856
		23204	36743	52336	58105	65282	51682
	AMPK	42192	48494	46113	42785	48284	44268
		42435	45325	45637	41544	46963	43693
		41865	44556	46338	42860	47955	45064
	P-AMPK/AMPK	0.566363	0.753743	1.14673	1.36412	1.34328	1.17575
		0.570048	0.809509	1.20374	1.43275	1.42129	1.20971
		0.554258	0.824648	1.12944	1.35569	1.36132	1.14686
ATG5	ATG5	52641	63293	65120	93725	101989	72183
		54390	62247	65647	94778	102648	72862
		55156	62628	66245	92526	101469	71789
	β-actin	50131	51702	52677	51477	49047	55017
		50131	51702	52677	51477	49047	55017
		50131	51702	52677	51477	49047	55017
	ATG5/β-actin	1.05007	1.22419	1.23621	1.82072	2.07941	1.31201
		1.08496	1.20396	1.24622	1.84117	2.09285	1.32435
		1.10024	1.21133	1.25757	1.79742	2.06881	1.30485
Beclin1	Beclin1	63462	86228	102776	118619	145926	99497
		62455	85070	103462	115614	141634	96927
		72196	88089	115980	123239	149005	105845
	β-actin	50131	51702	52677	51477	49047	55017
		50131	51702	52677	51477	49047	55017
		50131	51702	52677	51477	49047	55017
	Beclin1/β-actin	1.26592	1.66779	1.95106	2.30431	2.97523	1.80848
		1.24584	1.64539	1.96408	2.24594	2.88772	1.76176
		1.44015	1.70378	2.20172	2.39406	3.038	1.92386
p62	p62	96724	66863	67964	51300	30303	56524
		97656	65223	67676	51830	29538	55804
		98228	66289	67871	51098	29464	55912
	β-actin	50131	51702	53677	51477	49047	55017
		50131	51702	53677	51477	49047	55017
		50131	51702	53677	51477	49047	55017
	p62/β-actin	1.92942	1.29324	1.26617	0.996562	0.617836	1.02739
		1.94802	1.26152	1.2608	1.00686	0.602239	1.0143
		1.95943	1.28214	1.26443	0.992637	0.60073	1.01627
GLUT1	GLUT1	47796	89568	93514	104250	55000	18303
		48423	88733	93274	104850	55419	17892
		56325	97342	101561	112808	64147	24916
	β-actin	84241	94043	97832	89326	79894	81134
		84241	94043	97832	89326	79894	81134
		84241	94043	97832	89326	79894	81134
	GLUT1/β-actin	0.567372	0.952415	0.955863	1.16707	0.688412	0.22559
		0.574815	0.943536	0.95341	1.17379	0.693657	0.220524
		0.668617	1.03508	1.03812	1.26288	0.802901	0.307097
SGLT1	SGLT1	15655	27332	42928	47697	81053	66770
		14961	28185	44057	50334	82999	68671
		17063	29127	45256	49540	86784	71110
	β-actin	84241	94043	97832	89326	79894	81134
		84241	94043	97832	89326	79894	81134
		84241	94043	97832	89326	79894	81134
	SGLT1/β-actin	0.185836	0.290633	0.438793	0.533965	1.01451	0.82296
		0.177598	0.299703	0.450333	0.563487	1.03886	0.84639
		0.20255	0.30972	0.462589	0.554598	1.08624	0.876451
GLUT4	GLUT4	54699	43073	51278	58737	44778	37500
		55019	44587	53407	60570	46907	38977
		55040	44247	51646	60825	46684	38815
	β-actin	84241	94043	97832	89326	79894	81134
		84241	94043	97832	89326	79894	81134
		84241	94043	97832	89326	79894	81134
	GLUT4/β-actin	0.649316	0.458014	0.524143	0.657558	0.560468	0.462198
		0.653114	0.474113	0.545905	0.678078	0.587115	0.480403
		0.653364	0.470498	0.527905	0.680933	0.584324	0.478406
Bcl-2	Bcl-2	98888	100111	42125	59922	108098	130126
		96158	100794	37188	61248	106005	142006
		95575	100473	40898	64022	117956	142557
	β-actin	80827	71748	69797	80163	64863	75264
		80827	71748	69797	80163	64863	75264
		80827	71748	69797	80163	64863	75264
	Bcl-2/β-actin	1.22345	1.39531	0.603536	0.747502	1.66656	1.72893
		1.18968	1.40483	0.532802	0.764043	1.63429	1.88677
		1.18246	1.40036	0.585956	0.798648	1.81854	1.89409
Bax	Bax	35501	33122	43327	39170	33393	31373
		35384	33872	43825	39689	32951	31091
		35752	32792	43867	39652	33662	32363
	β-actin	45500	52655	31601	30641	54729	54373
		45500	52655	31601	30641	54729	54373
		45500	52655	31601	30641	54729	54373
	Bax/β-actin	0.780242	0.629038	1.37106	1.27835	0.610152	0.576996
		0.77767	0.643282	1.38682	1.29529	0.602076	0.57181
		0.785758	0.622771	1.38815	1.29408	0.615067	0.595204
Bcl-2/Bax	Bcl-2/β-actin	1.22345	1.39531	0.603536	0.747502	1.66656	1.72893
		1.18968	1.40483	0.532802	0.764043	1.63429	1.88677
		1.18246	1.40036	0.585956	0.798648	1.81854	1.89409
	Bax/β-actin	0.780242	0.629038	1.37106	1.27835	0.610152	0.576996
		0.77767	0.643282	1.38682	1.29529	0.602076	0.57181
		0.785758	0.622771	1.38815	1.29408	0.615067	0.595204
	Bcl-2/Bax	1.56804	2.21817	0.440195	0.584739	2.73138	2.99643
		1.5298	2.18385	0.384189	0.589862	2.71443	3.29965
		1.50487	2.2486	0.422112	0.617153	2.95665	3.18226
4.Flow cytometry analysis
Apoptosis Rate	NG	NG+EH	LG	LG+EH	HG	HG+EH
	1.09	0.94	1.46	1.06	0.77	0.63
	0.89	0.82	2.29	1.39	0.94	0.56
	1.06	0.86	2.13	1.09	0.69	0.63
